# Supplementary material for: Components of a Neanderthal gut microbiome recovered from fecal sediments from El Salt
Source: PubMed Central journal article supplement (PMC7864912; doi:10.1038/s42003-021-01689-y), 2021-02-05
Supplement: 42003_2021_1689_MOESM2_ESM.pdf [file 42003_2021_1689_MOESM2_ESM.pdf]

**Supplementary Information for:  
Components of a Neanderthal gut microbiome recovered from fecal sediments from El Salt**

Simone Rampelli<sup>†</sup>, Silvia Turrone<sup>†</sup>, Carolina Mallol, Cristo Hernandez, Bertila Galván, Ainara Sistiaga, Elena Biagi, Annalisa Astolfi, Patrizia Brigidi, Stefano Benazzi, Cecil M. Lewis Jr., Christina Warinner, Courtney A. Hofman, Stephanie L. Schnorr<sup>§</sup>, Marco Candela<sup>§</sup>

<sup>†</sup>These authors contributed equally.

<sup>§</sup>These authors jointly supervised this work.

This file includes:

- Supplementary Figure 1 to 9 p. 2 – 14
- Supplementary Table 1 to 3 p. 15 – 17
- Supplementary References p. 18

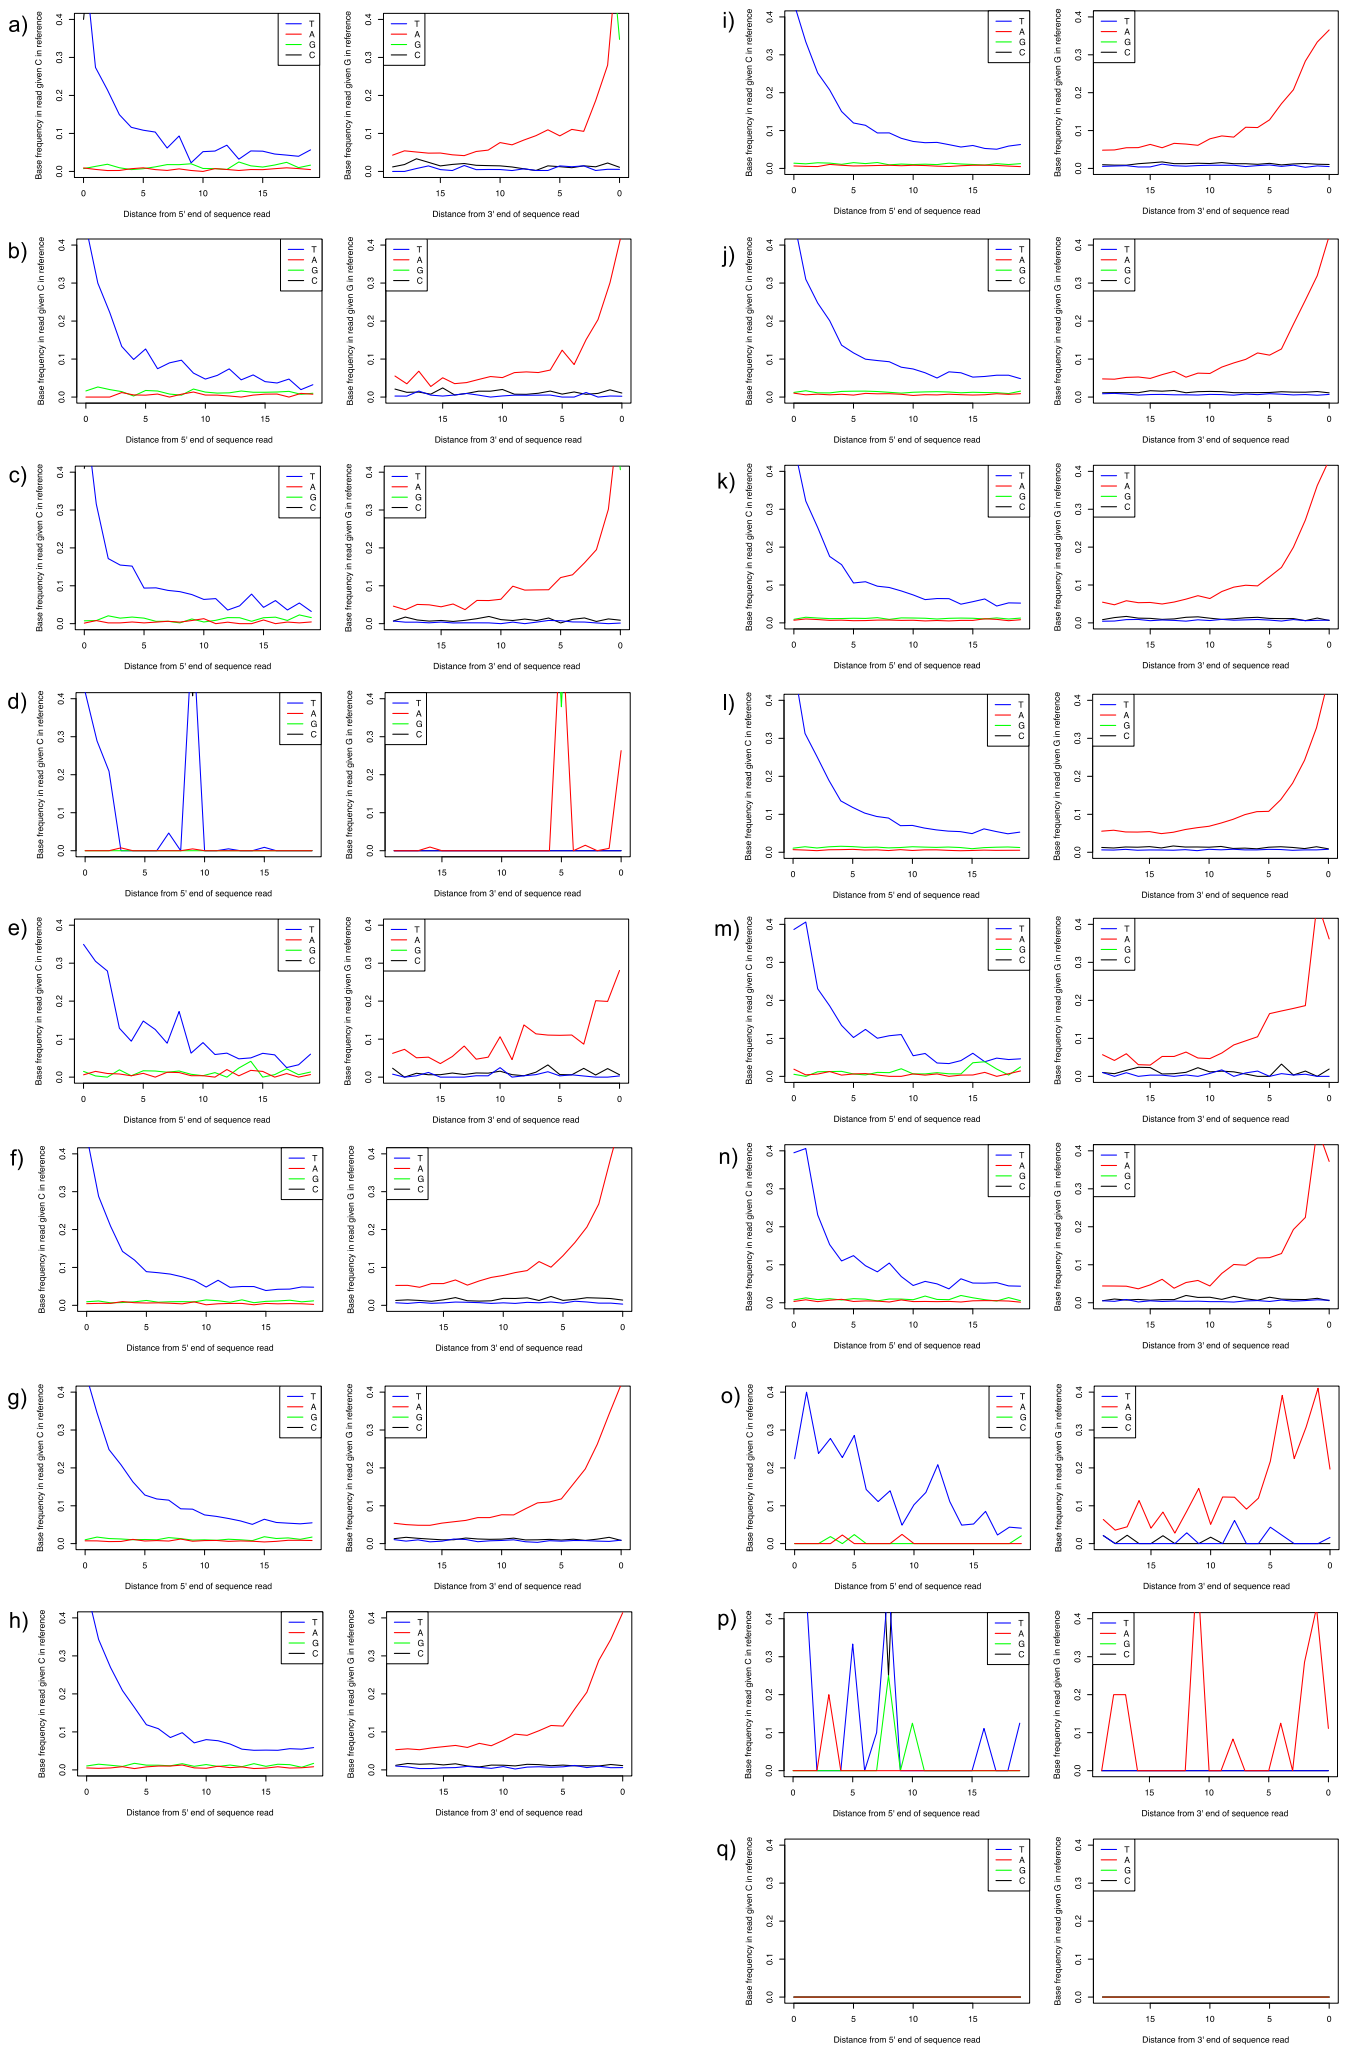

**Supplementary Figure 1.**

**Nucleotide mis-incorporation patterns arising from cytosine deamination in ancient bacterial DNA from El Salt sediment samples.** Patterns are shown for all samples (**a** VI; **b** V2; **c** V3; **d** IX; **e** Xa; **f-l** ES1 to ES7; **m** Xb; **n** XI) as well as for negative controls (**o** DNA extraction; **p** library preparation; **q** PCR). Please refer to Supplementary Table 1 for the number of ancient bacterial reads of each sample.

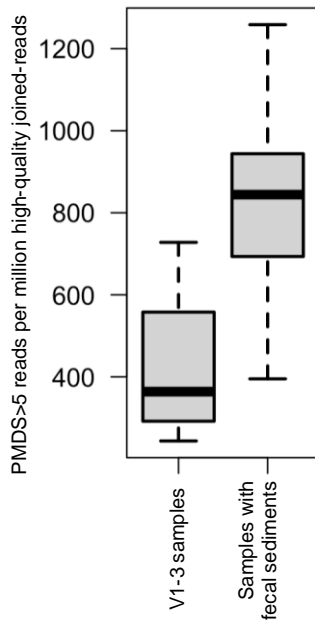

**Supplementary Figure 2.**

**The proportion of PMDS>5 reads discriminates samples containing fecal sediment from those with no or very few archeological remains.** The samples IX, Xa, ES1-7, Xb and XI (i.e., those positive for the presence of fecal biomarkers and/or associated with rich archaeological assemblages) were compared with samples V1-3 from SU V (i.e., negative samples, with no or very few archeological remains). P-value=0.01, Wilcoxon test.

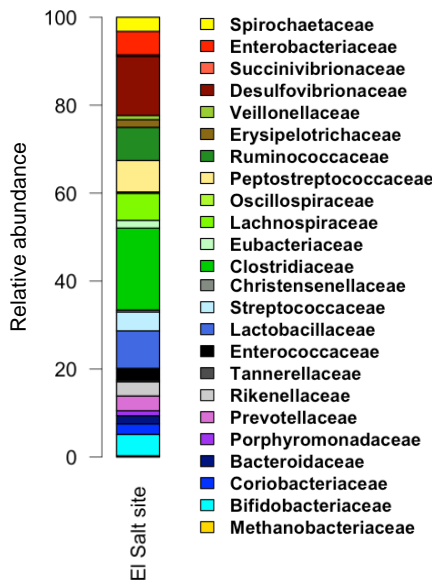

**Supplementary Figure 3.**

**Bar plot of the relative abundance of the 24 families common to the gut microbiome of hominids in the El Salt samples.** Comprehensive family-level relative abundance profile from all sedimentary samples positive for the presence of fecal biomarkers and/or associated with rich archaeological assemblages, i.e., samples IX, Xa, ES1-7, Xb and XI.

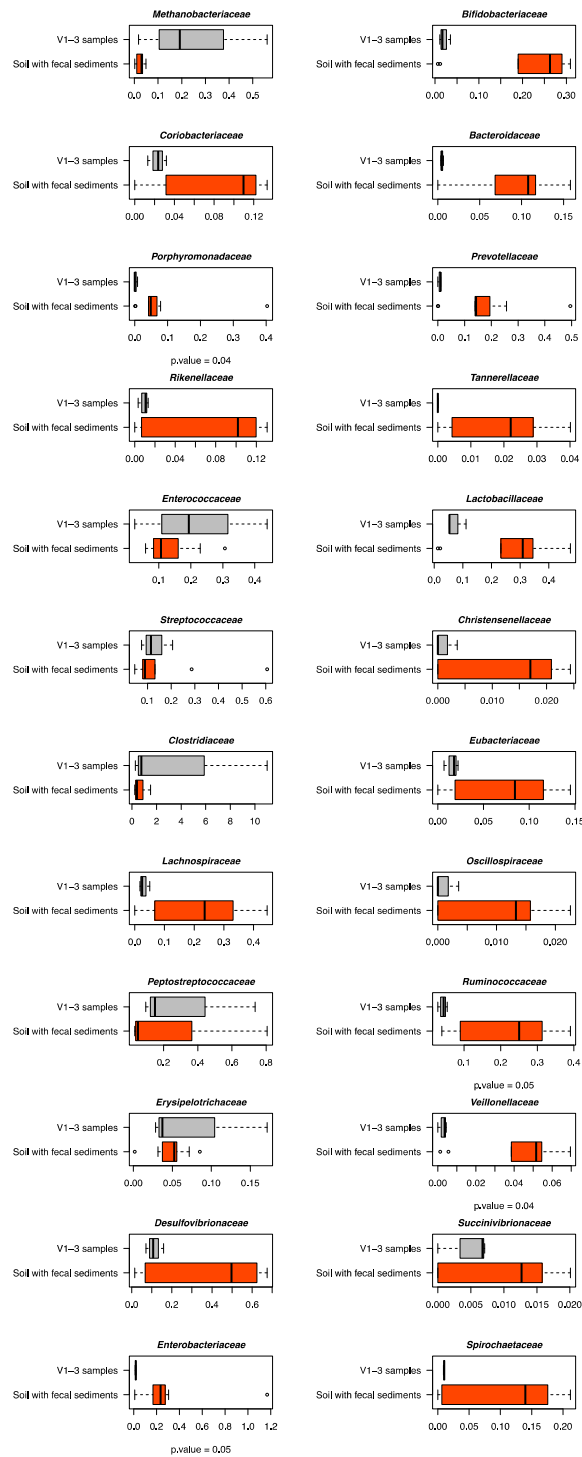

#### Supplementary Figure 4.

**Box plots of the relative abundance of the 24 families common to the gut microbiome of hominids in the El Salt samples.** Samples positive for the presence of fecal biomarkers and/or associated with rich archaeological assemblages (samples IX, Xa, ES1-7, Xb and XI) showed a higher relative contribution of PMDS>5 reads for most of the 24 families common to the gut microbiome of hominids compared to samples with no or very few archeological remains (samples from SU V). Relative abundances were calculated as a percentage of PMDS>5 reads for a specific family out of the total number of PMDS>5 reads in the sample. P-values  $\leq 0.05$  are reported (Wilcoxon test).

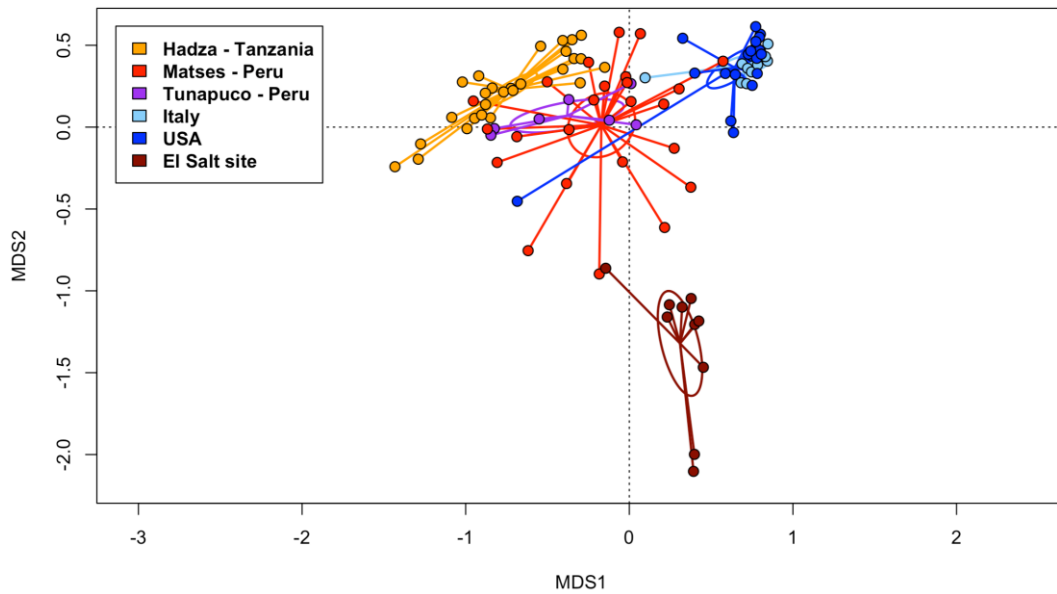

**Supplementary Figure 5.**

**Principal Coordinates Analysis based on Bray-Curtis distances between the family-level relative abundance profiles of El Salt samples and the gut microbiota of human populations adhering to different subsistence strategies.** The 24 families common to the gut microbiome of hominids were considered. For the El Salt site, samples IX, Xa, ES1-7, Xb and XI were included, i.e., those positive for the presence of fecal biomarkers and/or associated with rich archaeological assemblages. Publicly available data from the following human populations were included: urban Italians and Hadza hunter-gatherers from Tanzania (Rampelli *et al.*, 2015), urban US residents, Matses hunter-gatherers and Tunapuco rural agriculturalists from Peru (Obregon-Tito *et al.*, 2015). PCo1 and PCo2 account for 27% and 20% of the total variance, respectively. A significant separation between groups was found (p-value=0.0001, permutation test with pseudo-F ratio).

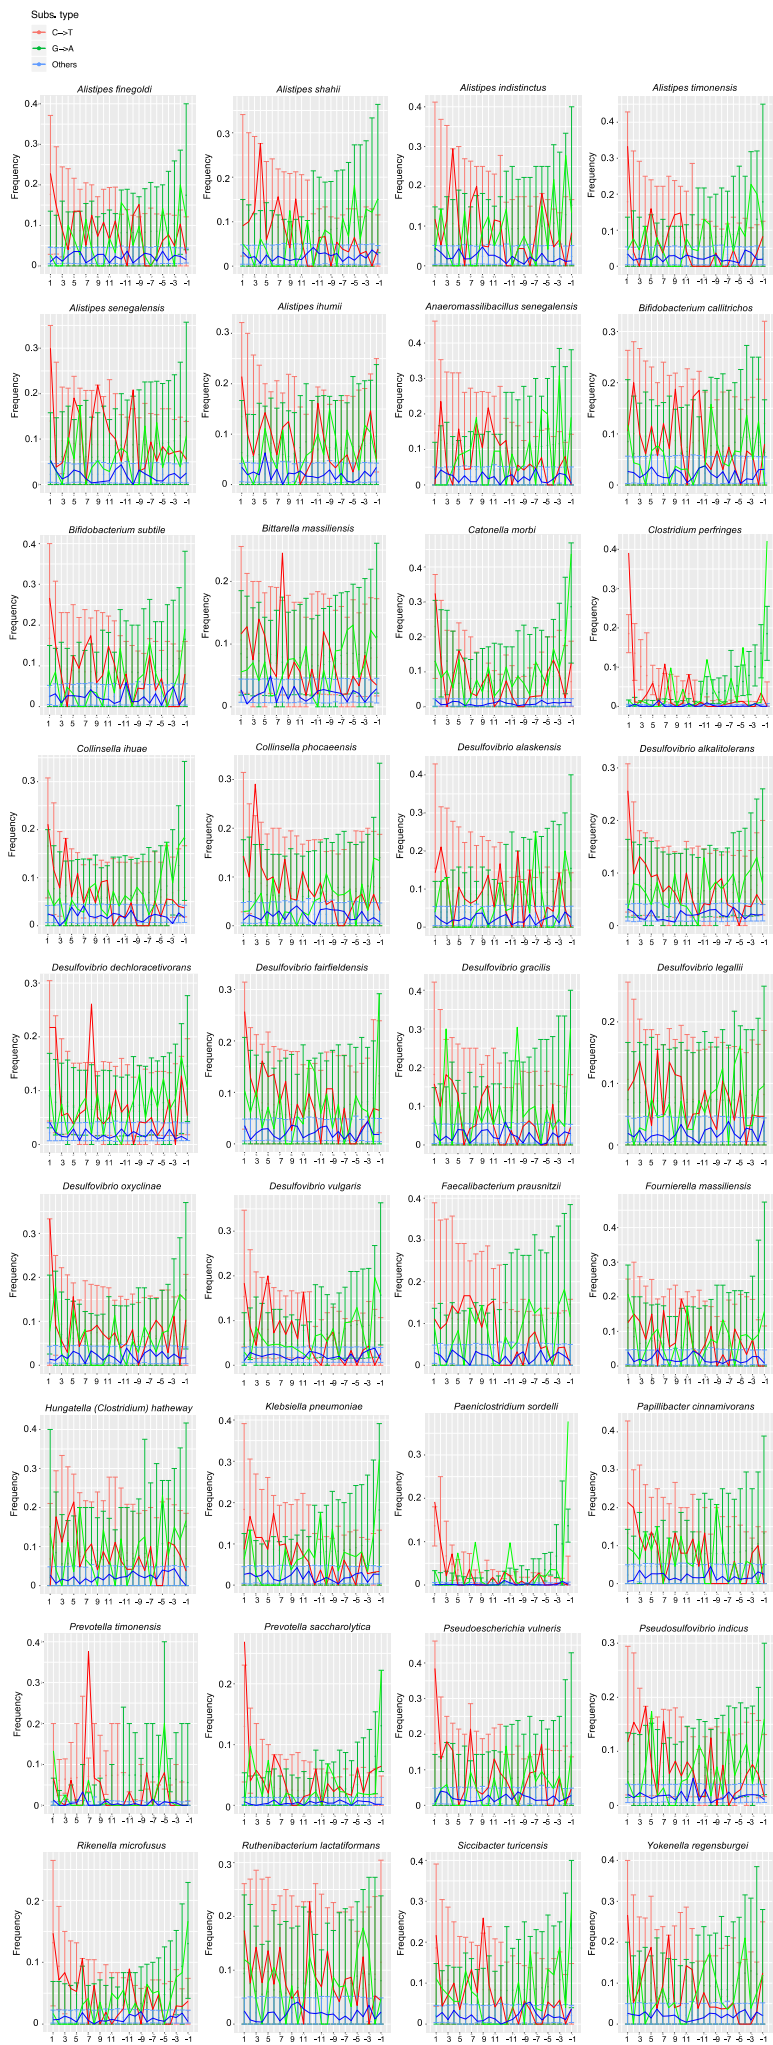



**Supplementary Figure 6.**

**MapDamage plots for bacterial taxa with  $\geq 200$  assigned reads and  $>50$  reads with PMDS  $>1$  recovered from the El Salt sediments.**

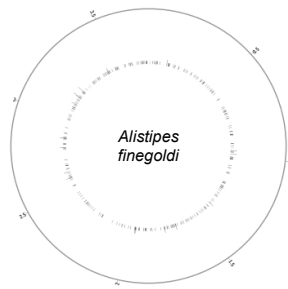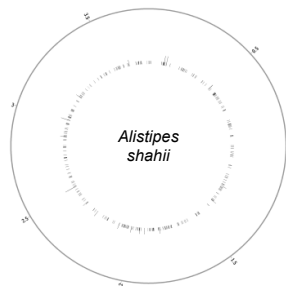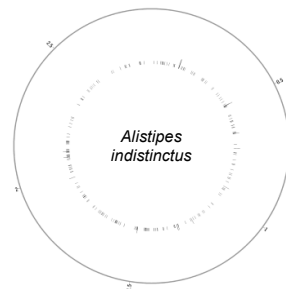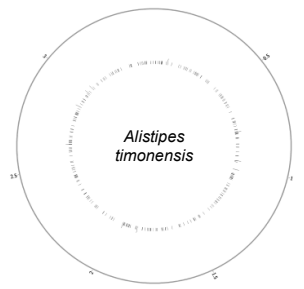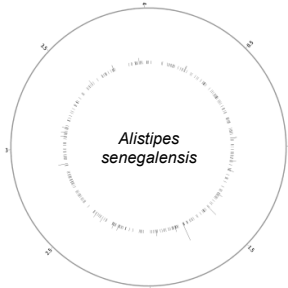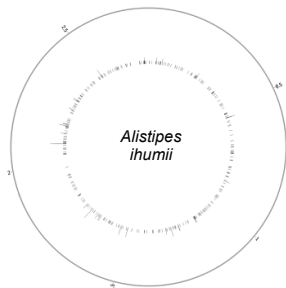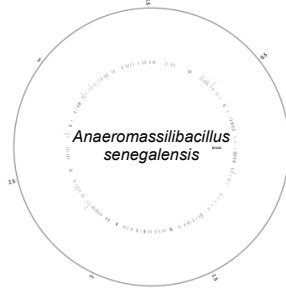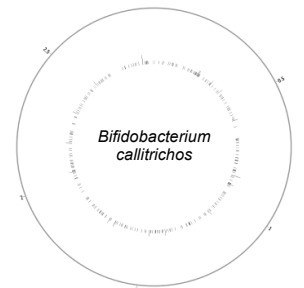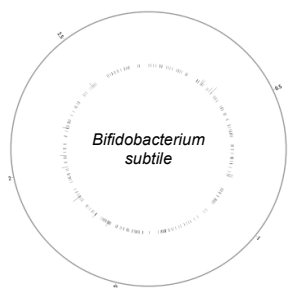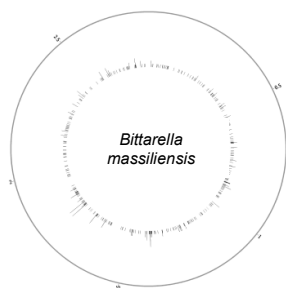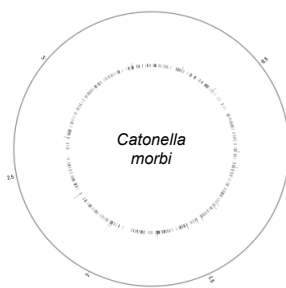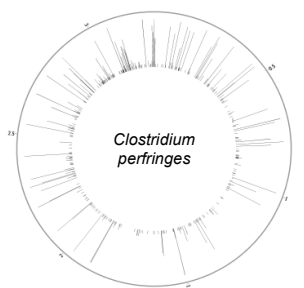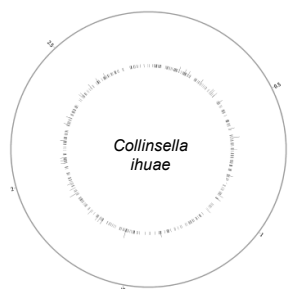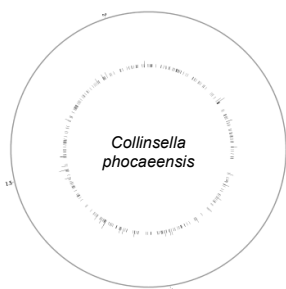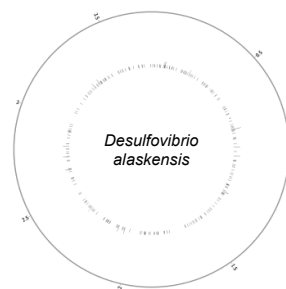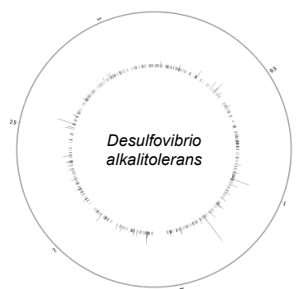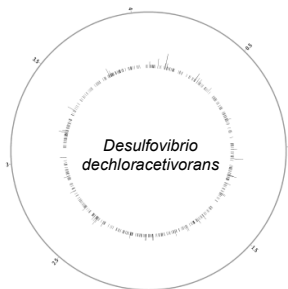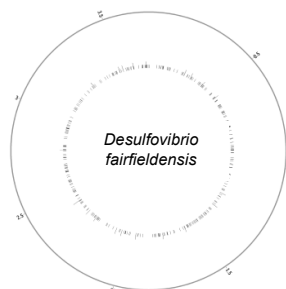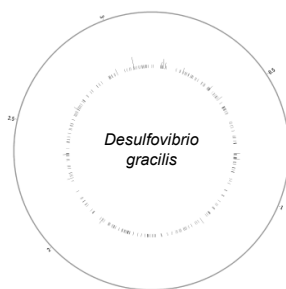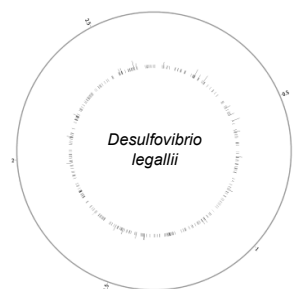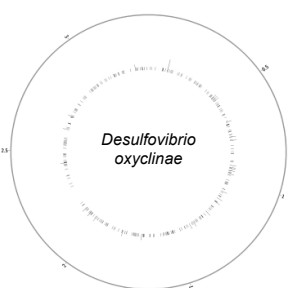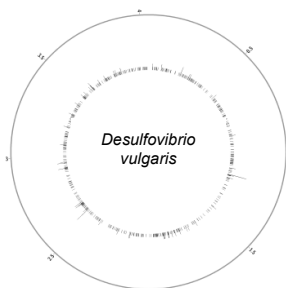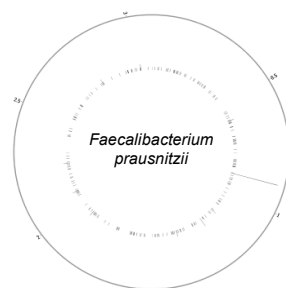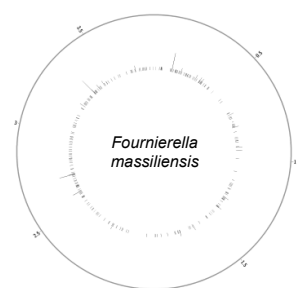

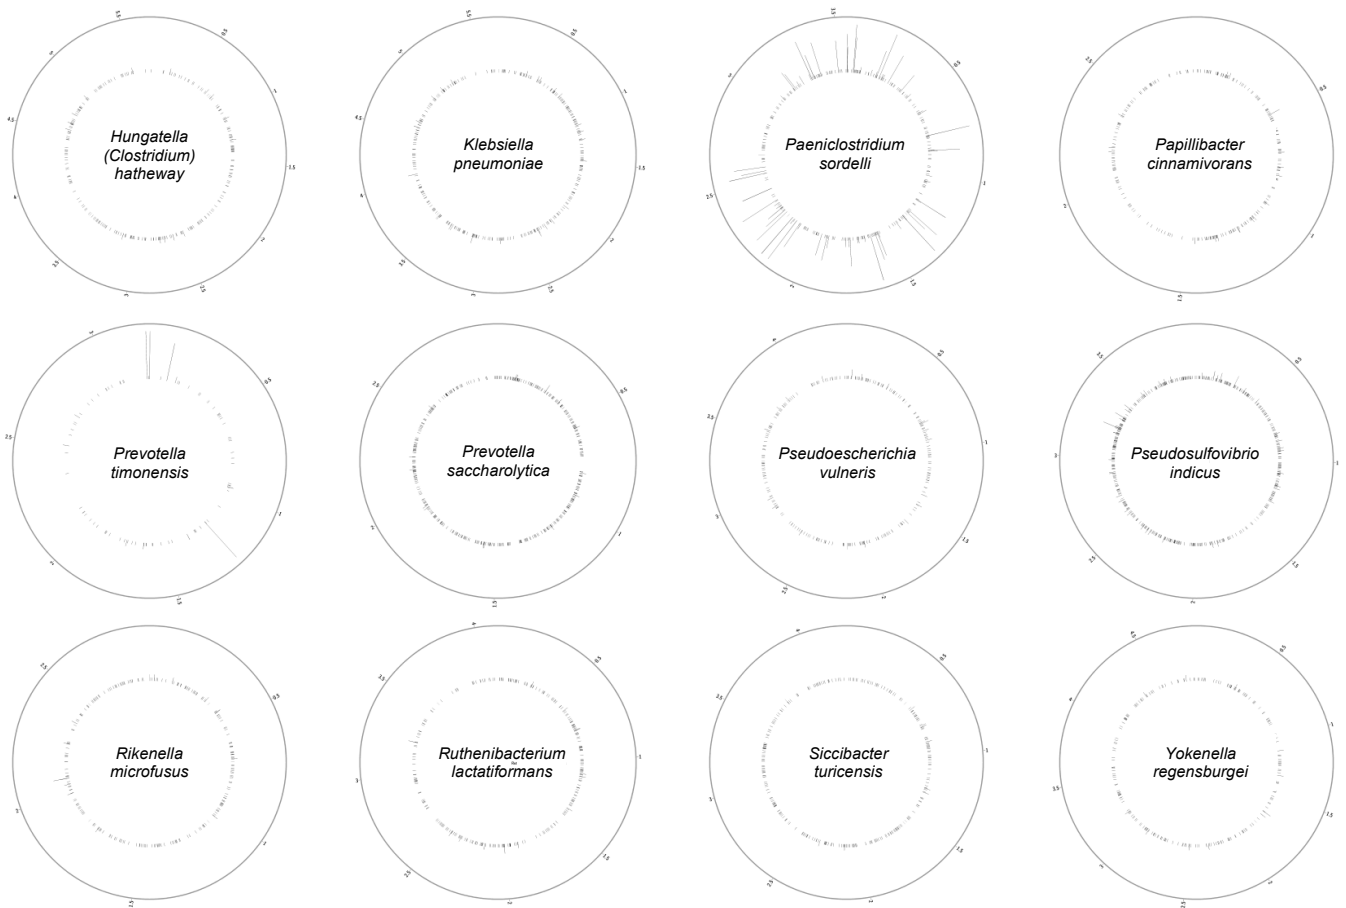

**Supplementary Figure 7.**  
**Coverage plots for bacterial taxa recovered from the El Salt sediments.**

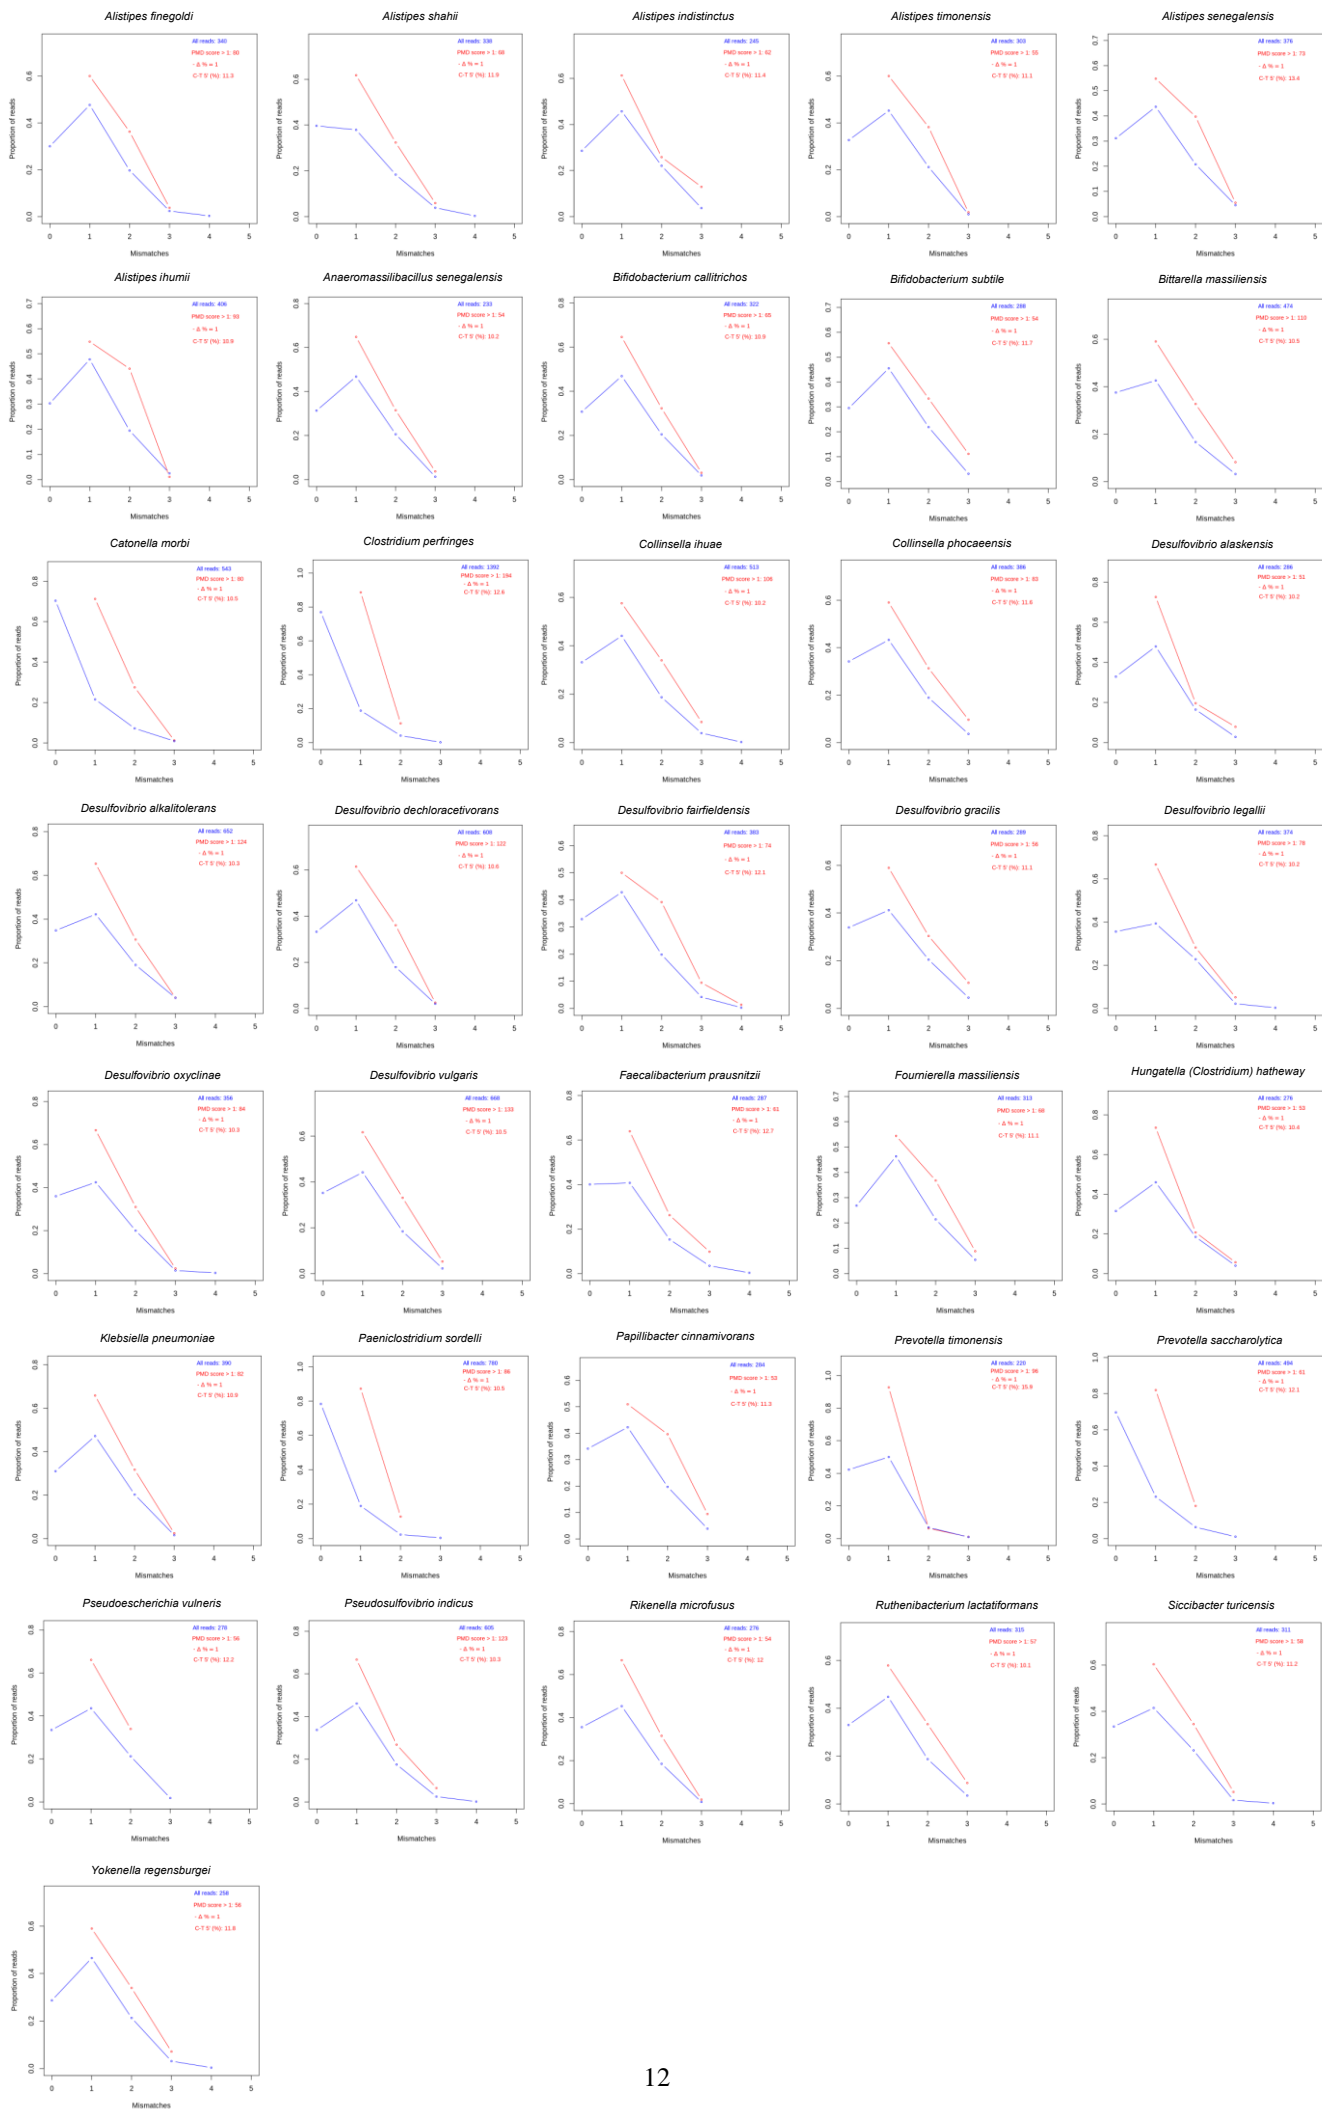

**Supplementary Figure 8.**

**Edit distance distributions of all reads (blue) and reads filtered for postmortem damage (PMDS>1) (red) for bacterial taxa with  $\geq 200$  assigned reads with >50 PMDS>1 reads recovered from the El Salt sediments.**

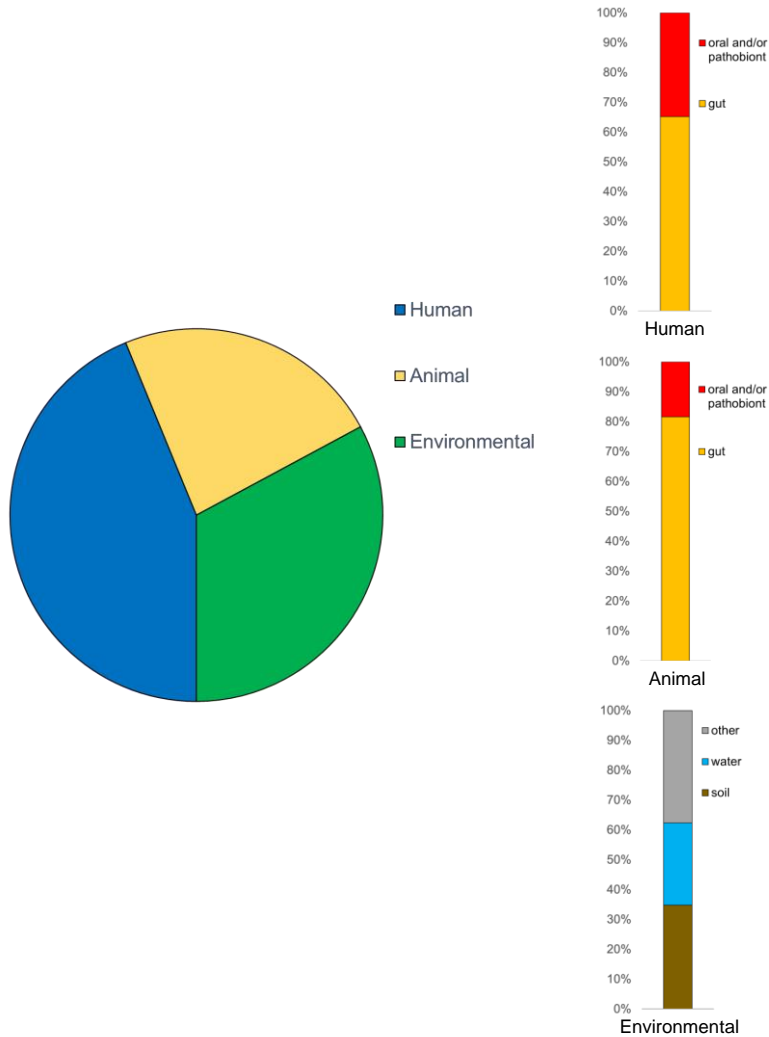

**Supplementary Figure 9.**

**Major source categories for the bacterial species of hominid-associated gut microbiome families, as detected in El Salt sediment samples.** Bacterial species were categorized according to a layered classification scheme as human (gut, oral and/or pathobiont), animal (gut, oral and/or pathobiont) and environmental (soil, water, other). Pie and bar charts show the proportion of species by source category.

**Supplementary Table 1.**

**Number of ancient bacterial sequences identified in El Salt sediment samples.** For each sample (V1 to XI) and negative control (ExtNeg, DNA extraction; LibNeg, library preparation; PCRNeg, PCR), the number of ancient bacterial sequences, as defined based on the approach by Skoglund *et al.* (2014), is shown, along with the number of paired-end sequences, pre and post-quality filtering.

| <b>Sample</b> | <b>Initial paired-end sequences</b> | <b>High-quality joined reads</b> | <b>Ancient bacterial reads</b> |
|---------------|-------------------------------------|----------------------------------|--------------------------------|
| V1            | 7,451,006                           | 3,666,150                        | 1,422                          |
| V2            | 8,326,191                           | 3,614,022                        | 1,229                          |
| V3            | 5,215,587                           | 2,369,988                        | 1,725                          |
| IX            | 22,001,002                          | 1,144,854                        | 279                            |
| Xa            | 219,636,326                         | 9,275,342                        | 4,257                          |
| ES1           | 9,822,677                           | 8,806,814                        | 8,537                          |
| ES2           | 16,013,042                          | 15,122,557                       | 12,689                         |
| ES3           | 16,182,726                          | 15,009,763                       | 12,674                         |
| ES4           | 14,716,570                          | 13,818,087                       | 9,555                          |
| ES5           | 12,261,584                          | 10,757,973                       | 10,121                         |
| ES6           | 11,708,225                          | 10,491,866                       | 8,420                          |
| ES7           | 25,055,781                          | 21,083,124                       | 17,901                         |
| Xb            | 13,378,449                          | 5,764,889                        | 2,278                          |
| XI            | 7,590,144                           | 3,667,077                        | 4,615                          |
| ExtNeg        | 454,624                             | 411,559                          | 144                            |
| LibNeg        | 113,428                             | 27,284                           | 42                             |
| PCRNeg        | 2,597                               | 2,263                            | 1                              |

**Supplementary Table 2.**

**Ancient human mtDNA reads in the El Salt samples.** All samples were subjected to target capture of mtDNA with a Neanderthal bait panel and subsequent NGS on Illumina NextSeq platform. Reads with a deamination profile resulting in PMDS >1 were used to calculate the breadth of coverage (>1x) and the negative difference proportion introduced by Hübler *et al.* (2019). Modern contamination refers to the results of the mtCont script of the Schmutzi pipeline (Renaud *et al.*, 2015). Such analysis was performed only for samples with breadth of coverage >10%. Samples with >1,000 PMDS>1 reads, breadth of coverage >10%,  $-\Delta \% \geq 0.9$  and mtCont contamination less than 2% were considered to contain ancient human mtDNA.

| <b>Sample</b> | <b>Reads</b> | <b>Reads PMDS &gt;1</b> | <b>&gt;1x (%)</b> | <b><math>-\Delta \%</math></b> | <b>Modern Contamination</b> |
|---------------|--------------|-------------------------|-------------------|--------------------------------|-----------------------------|
| V1            | 33,325       | 162                     | 4.0               | 1                              | NA                          |
| V2            | 270,437      | 26,570                  | 4.8               | 1                              | NA                          |
| V3            | 469,442      | 158                     | 2.9               | 1                              | NA                          |
| IX            | 1,587        | 0                       | 0.4               | 0                              | NA                          |
| Xa            | 1,669,396    | 962                     | 2.0               | 1                              | NA                          |
| ES1           | 238,391      | 21,977                  | 11.2              | 1                              | 1%                          |
| ES2           | 1,143,745    | 24,041                  | 27.6              | 1                              | 1%                          |
| ES3           | 524,157      | 822                     | 13.7              | 1                              | NA                          |
| ES4           | 239,272      | 244                     | 6.7               | 1                              | NA                          |
| ES5           | 833,836      | 7,855                   | 15.7              | 1                              | 1%                          |
| ES6           | 38,176       | 1,153                   | 6.9               | 1                              | NA                          |
| ES7           | 83,774       | 30                      | 3.0               | 1                              | NA                          |
| Xb            | 112,244      | 1,830                   | 19.1              | 1                              | 2%                          |
| XI            | 16           | 0                       | 0.0               | 0                              | NA                          |



**Supplementary Table 3.**  
**Adapter and oligo sequences used in the present study.**

| <b>Name</b>     | <b>Sequence 5'-3'</b>                                                          | <b>Use</b>        | <b>Ref.</b>                |
|-----------------|--------------------------------------------------------------------------------|-------------------|----------------------------|
| IS1             | A*C*A*C*TCTTTCCCTACACGACGCTCTTCCG*A*<br>T*C*T                                  | For all adapters  | Meyer and Kircher, 2010    |
| IS2             | G*T*G*A*CTGGAGTTCAGACGTGTGCTCTTCCG*A*<br>*T*C*T                                | For all adapters  | Meyer and Kircher, 2010    |
| IS3_BEDC3       | A*G*A*T*CGGAA*G*A*G*C[C3spacer]                                                | For BEDC3 adapter | Carøe <i>et al.</i> , 2017 |
| P7 index primer | CAAGCAGAAGACGGCATACGAGATNNNNNNNNG<br>TGACTGGAGTTCAGACGTGTGCTCTTCCG             | Index PCR         | Present paper              |
| P5 index primer | AATGATACGGCGACCACCGAGATCTACACNNNN<br>NNNNACACTCTTTCCCTACACGACGCTCTTCCGA<br>TCT | Index PCR         | Present paper              |

## Supplementary References

1. Carøe, C. *et al.* Single-tube library preparation for degraded DNA. *Methods Ecol. Evol.* **9**, 410-419 (2018).
2. Hübler, R. *et al.* HOPS: automated detection and authentication of pathogen DNA in archaeological remains. *Genome Biol.* **20**, 280; 10.1186/s13059-019-1903-0 (2019).
3. Meyer, M. & Kircher, M. Illumina sequencing library preparation for highly multiplexed target capture and sequencing. *Cold Spring Harb. Protoc.* **2010**(6), pdb.prot5448 (2010).
4. Obregon-Tito, A. J. *et al.* Subsistence strategies in traditional societies distinguish gut microbiomes. *Nat. Commun.* **6**, 6505; 10.1038/ncomms7505 (2015).
5. Rampelli, S. *et al.* Metagenome sequencing of the Hadza hunter-gatherer gut microbiota. *Curr. Biol.* **25**, 1682-1693 (2015).
6. Renaud, G., Slon, V., Duggan, A. T. & Kelso, J. Schmutzi: estimation of contamination and endogenous mitochondrial consensus calling for ancient DNA. *Genome Biol.* **16**, 224; 10.1186/s13059-015-0776-0 (2015).
7. Skoglund, P. *et al.* Separating endogenous ancient DNA from modern day contamination in a Siberian Neandertal. *Proc. Natl. Acad. Sci. U.S.A.* **111**, 2229-2234 (2014).
