# Supplementary material for: Components of a Neanderthal gut microbiome recovered from fecal sediments from El Salt
Source: Commun Biol. 2021 Feb 5;4:169. doi: 10.1038/s42003-021-01689-y (PMC7864912; doi:10.1038/s42003-021-01689-y)
Supplement: Supplementary file 6 — Supplementary Data 3 [file 42003_2021_1689_MOESM6_ESM.xlsx]

## Sheet: Sheet1
	Isolation
Taxon	First documented source	Original reference	Detected in human (or animal) gut
Methanobacteriaceae
Methanobrevibacter cuticularis	Hindgut of termites	Leadbetter and Breznak, 1996
Methanobrevibacter gottschalkii	Feces of horses and pigs	Miller and Lin, 2002
Methanobrevibacter oralis	Human subgingival plaque	Ferrari et al., 1994	Khelaifia et al., 2013
Bifidobacteriaceae
Bifidobacterium aesculapii	Feces of the baby common marmoset	Modesto et al., 2014
Bifidobacterium biavatii	Feces of red-handed tamarin	Endo et al., 2012
Bifidobacterium bombi	Digestive tract of bumblebee	Killer et al., 2009
Bifidobacterium choerinum	Feces of suckling piglets; sewage	Scardovi et al., 1979
Bifidobacterium cuniculi	Feces of adult rabbits	Scardovi et al., 1979
Bifidobacterium magnum	Feces of adult rabbits	Scardovi and Zani, 1974
Bifidobacterium mongoliense	Airag, a traditional fermented mare’s milk product from Mongolia	Watanabe et al., 2009	Wang et al., 2015
Bifidobacterium psychraerophilum	Porcine caecum (contents and epithelium)	Simpson et al., 2004
Bifidobacterium saguini	Feces of red-handed tamarin	Endo et al., 2012
Bifidobacterium scardovii	Human clinical sources (blood, urine, hip)	Hoyles et al., 2002	Tannock et al., 2013
Bifidobacterium stellenboschense	Feces of red-handed tamarin	Endo et al., 2012
Bifidobacterium subtile	Sewage	Biavati et al., 1982	Rajilić-Stojanović and de Vos, 2014 – suspected intestinal origin
Bifidobacterium thermophilum	Piglet stomach and feces, bovine rumen, calf feces; sewage	Biavati et al., 1982	von Ah et al., 2007
Bifidobacterium tsurumiense	Dental plaque from golden hamsters fed with a high-carbohydrate diet	Okamoto et al., 2008
Scardovia inopinata	Human dental caries	Crociani et al., 1996
Coriobacteriaceae
Collinsella ihuae	Human feces (healthy French volunteer)	Durand et al., 2017
Collinsella intestinalis	Human feces	Kageyama and Benno, 2000
Collinsella phocaeensis	Human feces (healthy French patients)	Ndongo et al., 2017
Collinsella stercoris	Human feces	Kageyama and Benno, 2000
Coriobacterium glomerans	Intestinal tract of the red soldier bug	Haas and König, 1988	Harmsen et al., 2000
Senegalimassilia anaerobia	Human feces (healthy Senegalese patient)	Lagier et al., 2013
Bacteroidaceae
Bacteroides sp.	Gastrointestinal tract	Shah and Collins, 1989
Prevotellaceae
Prevotella sp.	Oral cavity, upper respiratory and urogenital tracts	Shah and Collins, 1990	De Filippo et al., 2010
Rikenellaceae
Alistipes sp.	Feces, abdominal and rectal abscesses, cases of aíte appendicitis, foot rot in sheep, farm soil and rarely the human mouth	Rautio et al., 2003
Tannerellaceae
Parabacteroides sp.	Human feces and clinical specimens of intestinal origin	Sakamoto and Benno, 2006
Enterococcaceae
Bavariicoccus seileri	Surface and smear water of soft cheese	Schmidt et al., 2009
Enterococcus aquimarinus	Sea water	Svec et al., 2005
Enterococcus casseliflavus	Plants, silage and soil	Collins et al., 1984	Schneider et al., 1999
Enterococcus cecorum	Ceca of chickens	Devriese et al., 1983	Ishiya and Aburatani, 2019
Enterococcus columbae	Pigeon intestines	Devriese et al., 1990	Alauzet et al., 2019 – mouse
Enterococcus faecalis	Intestinal flora of humans and animals	Schleifer and Kilpper-Bälz, 1984
Enterococcus faecium	Intestinal flora of humans and animals	Schleifer and Kilpper-Bälz, 1984
Enterococcus mundtii	Isolated from cows, the hands of milkers, plants and soil	Collins et al., 1986	Milanović et al., 2019
Enterococcus phoeniculicola	Uropygial gland of woodhoopoes	Law-Brown and Meyers, 2003	PhD thesis of Bilen M, 2018
Lactobacillaceae
Lactobacillus agilis	Sewage	Weiss et al., 1981	Luang-In et al., 2016
Lactobacillus amylophilus	Swine waste-corn fermentation	Nakamura and Crowell, 1979	PhD thesis of Iyngkaran G, 2015
Lactobacillus animalis	Dental plaque and alimentary canal of animals	Dent and Williams, 1982
Lactobacillus aquaticus	Eutrophic freshwater pond	Mañes-Lázaro et al., 2009
Lactobacillus equicursoris	Horse feces	Morita et al., 2010
Lactobacillus fabifermentans	Cocoa bean heap fermentations	De Bruyne et al., 2009
Lactobacillus harbinensis	Traditional fermented vegetables	Miyamoto et al., 2005	Rossi et al., 2016
Lactobacillus ingluviei	Intestinal tract of pigeons	Baele et al., 2003
Lactobacillus kimchicus	Kimchi, fermented vegetable food	Liang et al., 2011
Lactobacillus malefermentans	Beer	Farrow et al., 1988
Lactobacillus manihotivorans	Cassava sour starch fermentation	Morlon-Guyot et al., 1998	Bullock et al., 2004
Lactobacillus nasuensis	Silage	Cai et al., 2012
Lactobacillus pantheris	Feces of a jaguar	Liu and Dong, 2002
Lactobacillus reuteri	Human feces	Kandler et al., 1980
Lactobacillus ruminis	Bovine rumen	Lerche and Reuter, 1961
Lactobacillus secaliphilus	Type II sourdough fermentation	Ehrmann et al., 2007	Bhogoju et al., 2018 – chicken
Lactobacillus senmaizukei	Japanese pickle	Hiraga et al., 2008	Li et al., 2016 – Drosophila; Luo et al., 2018 – mouse
Lactobacillus thailandensis	Fermented fish	Tanasupawat et al., 2000
Lactobacillus vaccinostercus	Dried cow dung	Okada et al., 1979
Lactobacillus vini	Fermenting grape must	Rodas et al., 2006	Rossi et al., 2016
Streptococcaceae
Lactococcus garvieae	Bovine mastitis	Collins et al., 1983	Kubota et al., 2010
Streptococcus anginosus group	Purulent human infections	Jacobs et al., 2000	Pasolli et al., 2016
Streptococcus criceti	Oral cavities of wild rats, hamsters and occasionally humans	Whiley and Beighton, 1998	Seng et al., 2013 – clinical isolates
Streptococcus cristatus	Human oral cavity and throat	Handley et al., 1991	Bittar et al., 2014
Streptococcus ferus	Mouths of wild rats	Whatmore and Whiley, 2002	PhD thesis of van den Bogert, 2013
Streptococcus gordonii	Human oral cavities and pharynges	Kilian et al., 1989	Zhong et al., 2019
Streptococcus mitis	Human saliva and intestinal contents	Andrewes and Horder, 1906	Petrof et al., 2013
Streptococcus parasanguinis	Human throats, blood and urine	Whiley et al., 1990	Hakansson and Molin, 2011
Streptococcus pneumoniae	Human blood, spinal fluid and the respiratory tract	Mufson, 1990
Streptococcus sanguinis	Human throat swabs	Henriksen and Henrichsen, 1975	Casén et al., 2015
Christensenellaceae
Christensenella timonensis	Human feces	Ndongo et al., 2016b
Clostridiaceae
Butyricicoccus pullicaecorum	Caecal content of a broiler chicken	Eeckhaut et al., 2008	Rajilić-Stojanović and de Vos, 2014
Clostridium aceticum	Sewage sludge	Gottschalk and Braun, 1981
Clostridium algidicarnis	Vacuum-packed cooked pork	Lawson et al., 1994	Santiago-Rodriguez et al., 2015 (Pre-Columbian Andean mummy paleofeces); Lugli et al., 2017 (distal gut microbiota of the Tyrolean Iceman)
Clostridium baratii	Canine renal epithelioma, boil	Cato et al., 1982	Lepercq et al., 2004
Clostridium botulinum	Soil and aquatic sediments	Doyle, 1989	Santiago-Rodriguez et al., 2015
Clostridium kluyveri	Mud of a canal	Barker, 1937
Clostridium neonatale	Feces and blood from premature neonates	Alfa et al., 2002
Clostridium novyi	Gas gangrene of man and other animals	Novy, 1894	Thompson et al., 2018 – cattle
Clostridium paraputrificum	Human feces	Bokkenheuser et al., 1976
Clostridium pasteurianum	Soil and bursting swells of canned pineapple	Spiegelberg, 1940	Fischbach and Sonnenburg, 2011
Clostridium perfringens	Human feces	ten Krooden and Owens, 1957
Clostridium phoceensis	Human feces (healthy French man)	Hosny et al., 2016
Clostridium sartagoforme	Horse feces	Simůnek et al., 2001	Wang et al., 2005 – pig; Nathani et al., 2015 – buffalo; Xue et al., 2015 – giant panda; Zhang et al., 2015b – cow; Awad et al., 2016 – broiler chicken
Clostridium thermobutyricum	Cellulolytic enrichment cultures inoculated with horse manure	Wiegel et al., 1989
Fervidicella metallireducens	Geothermal waters	Ogg and Patel, 2010
Geosporobacter ferrireducens	Oil-contaminated site	Hong et al., 2015
Hungatella hathewayi	Human feces	Steer et al., 2001
Lactonifactor longoviformis	Human feces (healthy adult)	Clavel et al., 2007
Lutispora thermophila	Thermophilic methanogenic bioreactor digesting municipal solid wastes	Shiratori et al., 2008
Youngiibacter fragilis	Natural gas production-water	Lawson et al., 2014	Tanca et al., 2017 - mouse
Eubacteriaceae
Acetobacterium bakii	Anaerobic sediment of a pond polluted by paper-mill waste water	Kotsyurbenko et al., 1995
Eubacterium limosum	Rumen fluid of sheep	Sharak Genthner et al., 1981
Eubacterium pyruvativorans	Rumen fluid of sheep	Wallace et al., 2003
Pseudoramibacter alactolyticus	Dental calculus and the gingival crevices of patients with periodontal disease, root canals, and from patients with various infections, including purulent pleurisy, jugal cellulitis, postoperative wounds, and abscesses of the brain, lung, intestinal tract and mouth	Willems and Collins, 1996	Rajilić-Stojanović and de Vos, 2014 - suspected intestinal origin
Lachnospiraceae
Anaerobium acetethylicum	Methanogenic bioreactor	Patil et al., 2015
Anaerocolumna jejuensis	Soil	Jeong et al., 2004
Bariatricus massiliensis	Human feces (obese woman who underwent bariatric surgery)	Bessis et al., 2016a
Blautia hansenii	Human feces	Holdeman and Moore, 1974
Butyrivibrio fibrisolvens	Ruminal ingesta	Bryant and Small, 1956	Rodríguez Hernáez et al., 2018
Butyrivibrio proteoclasticus	Cow rumen	Moon et al., 2008
Catonella morbi	Human gingival crevice (associated with periodontitis)	Moore and Moore, 1994
Coprococcus eutactus	Human feces	Holdeman and Moore, 1974
Dorea formicigenerans	Human feces	Taras et al., 2002
Eisenbergiella tayi	Human blood	Amir et al., 2014	Wang et al., 2016 – germ-free mice inoculated with human fecal bacteria
Fusicatenibacter saccharivorans	Human feces	Takada et al., 2013
Johnsonella ignava	Human gingival crevice (with gingivitis and periodontitis)	Moore and Moore, 1994
Lachnoanaerobaculum saburreum	Dental plaque	Hedberg et al., 2012
[Clostridium] asparagiforme	Human feces (healthy donor)	Mohan et al., 2006
[Clostridium] bolteae	Human sources (feces, blood and intra-abdominal abscess)	Song et al., 2003
[Clostridium] citroniae	Human clinical infections (intra-abdominal specimens, pelvic specimens, skin, blood)	Warren et al., 2006	Andoh et al., 2016; Stadlbauer et al., 2017
[Clostridium] hylemonae	Human feces (healthy adult)	Kitahara et al., 2000
[Clostridium] scindens	Human feces (healthy subject)	Morris et al., 1985
Roseburia hominis	Human feces	Duncan et al., 2006
Sellimonas intestinalis	Human feces (healthy Korean woman)	Seo et al., 2016
Shuttleworthia satelles	Human subgingival plaque and periodontal pockets in patients with periodontitis	Downes et al., 2002	Nava et al., 2011 – mouse
Stomatobaculum longum	Human subgingival dental plaque	Sizova et al., 2013
Oscillospiraceae
Oscillibacter ruminantium	Rumen of Korean native cattle	Lee et al., 2013
Peptostreptococcaceae
Acetoanaerobium sticklandii	Black mud	Galperin et al., 2016
Paeniclostridium sordellii	Human gangrenous infections	Sasi Jyothsna et al., 2016	Ohashi and Fujisawa, 2019
Paraclostridium bifermentas	Putrefied butcher’s meat	Sasi Jyothsna et al., 2016	Ohashi and Fujisawa, 2019
[Clostridium] dakarense	Human feces (4-month-old child suffering from gastroenteritis)	Lo et al., 2013
Romboutsia timonensis	Human gut (by right colon lavage)	Ricaboni et al., 2016
[Clostridium] hiranonis	Human feces (healthy subject)	Kitahara et al., 2001
Ruminococcaceae
Acutalibacter muris	Mouse intestine	Lagkouvardos et al., 2016
Anaeromassilibacillus senegalensis	Human feces (1-year-old kwashiorkor patient)	Guilhot et al., 2016
Anaerotruncus colihominis	Human feces	Lawson et al., 2004
Anaerotruncus rubiinfantis	Human feces (13-month-old kwashiorkor girl)	Pham et al., 2017
Angelakisella massiliensis	Human ileum liquid (woman who underwent colonoscopy for colonic polyp control)	Mailhe et al., 2017
Bittarella massiliensis	Human feces (healthy man)	Durand et al., 2016
Ethanoligenes harbinense	Molasses wastewater	Xingxu et al., 2006	Ghali et al., 2016 – rumen
Faecalibacterium prausnitzii	Human feces	Duncan et al., 2002
Fournierella massiliensis	Human feces	Togo et al., 2017
Gemmiger formicilis	Human feces	Gossling and Moore, 1975
Hydrogenoanaerobacterium saccharovorans	H2-producing up-flow anaerobic sludge blanket granules	Song and Dong, 2009	Peris-Bondia et al., 2011
Neglecta timonensis	Human feces (woman with type 2 diabetes)	Bessis et al., 2016b
Papillibacter cinnamivorans	Shea cake digester	Defnoun et al., 2000	Korpela et al., 2014
Phocea massiliensis	Human feces (patients hospitalized for the treatment of a melanoma)	Ndongo et al., 2016c
Provencibacterium massiliense	Human feces (healthy Bedouin)	Traore et al., 2017
[Clostridium] leptum	Human feces	Moore et al., 1976
[Clostridium] methylpentosum	Human feces	Himelbloom and Canale-Parola, 1989
[Clostridium] viride	Anaerobic sewage sludge	Buckel et al., 1994	Swidsinski et al., 2017
Ruminococcus bicirculans	Human feces	Wegmann et al., 2014
Ruminococcus flavefaciens	Rumen of sheep and cattle	Sijpesteijn, 1951	Schwiertz et al., 2010
Ruminococcus gauvreauii	Human feces	Domingo et al., 2008
Ruthenibacterium lactatiformans	Human feces (male adult)	Shkoporov1 et al., 2016
Sporobacter termitidis	Hindgut of the wood-feeding termite	Grech-Mora et al., 1996	Tims et al., 2013
Subdoligranulum variabile	Human feces (female adult)	Holmstrøm et al., 2004
Erysipelotrichaceae
Faecalibaculum rodentium	Feces of a laboratory mouse	Chang et al., 2015
Holdemania massiliensis	Human feces (female adult suffering from severe restrictive anorexia nervosa)	Pfleiderer et al., 2013
Ileibacterium valens	Murine intestinal contents	Cox et al., 2017
Massiliomicrobiota timonensis	Human feces (87-year-old patient with cognitive impairment complicated by weight loss)	Ndongo et al., 2016a
Turicibacter sanguinis	Blood culture of a febrile patient with acute appendicitis	Bosshard et al., 2002	Cuív et al., 2011
Veillonellaceae
Dialister succinatiphilus	Human feces	Morotomi et al., 2008
Desulfovibrionaceae
Bilophila wadsworthia	Appendicitis specimens and human feces	Baron et al., 1989
Desulfocurvus vexinensis	Deep subsurface aquifer	Klouche et al., 2009	Powell et al., 2015 – mouse
Desulfovibrio africanus	Freshwater or salt water	Campbell et al., 1966
Desulfovibrio alaskensis	Soured oil reservoir	Feio et al., 2004	Martínez-del Campo et al., 2015
Desulfovibrio alcoholivorans	Anaerobic industrial fermenter fed with wastewater from the alcohol industry	Qatibi et al., 1991
Desulfovibrio alkalitolerans	District heating water	Abildgaard et al., 2006
Desulfovibrio aminophilus	Anaerobic dairy wastewater lagoon	Baena et al., 1998	Bashiardes et al., 2016
Desulfovibrio bizertensis	Marine sediments	Haouari et al., 2006	Axling et al., 2012 – mouse
Desulfovibrio brasiliensis	Sediments of a dolomite-forming hypersaline coastal lagoon	Warthmann et al., 2005
Desulfovibrio dechloracetivorans	Tidal muds	Sun et al., 2000
Desulfovibrio desulfuricans	Tar and sand mix around corroded gas main	Butlin et al., 1949	Loubinoux et al., 2002a
Desulfovibrio fairfieldensis	Liver abscess	Tee et al., 1996	Loubinoux et al., 2002a
Desulfovibrio fructosivorans	Estuarine sediment	Ollivier et al., 1988
Desulfovibrio gigas	Water pond	Le Gall, 1963	Li et al., 2011
Desulfovibrio hydrothermalis	Hydrothermal vents	Alazard et al., 2003
Desulfovibrio legallii	Wastewater digestor	Thabet et al., 2011	Chen et al., 2019
Desulfovibrio longus	Oil-producing well	Magot et al., 1992	De Cruz et al., 2015
Desulfovibrio magneticus	Freshwater sulfide-rich sediments	Sakaguchi et al., 2002
Desulfovibrio mexicanus	Up-flow anaerobic sludge blanket reactor treating cheese factory wastewaters	Hernandez-Eugenio et al., 2000
Desulfovibrio oxyclinae	Upper layer of a hypersaline microbial mat	Krekeler et al., 1997
Desulfovibrio piger	Human feces	Loubinoux et al., 2002b
Desulfovibrio putealis	Deep subsurface acquifer	Basso et al., 2005
Desulfovibrio salexigens	Hypersaline environment	Postgate and Campbell, 1966
Halodesulfovibrio marinisediminis	Coastal marine sediment	Shivani et al., 2017
Mailhella massiliensis	Human feces (healthy French patients)	Ndongo et al., 2017
Pseudodesulfovibrio aespoeensis	Deep granitic rock aquifers	Motamedi and Pedersen, 1998
Pseudodelsufovibrio indicus	Deep-sea serpentinized peridotite	Cao et al., 2016
Succinivibrionaceae
Succinimonas amylolytica	Bovine rumen	Bryant et al., 1958
Enterobacteriaceae
Buttiauxella ferragutiae	Unpolluted soil	Müller et al., 1996	Wüst et al., 2011 – earthworm
Cronobacter sakazakii	Human clinical specimens (sputum, feces and wounds)	Farmer et al., 1980
Enterobacter cloacae complex	Human clinical specimens (sputum, blood, urine, wound)	Hormaeche and Edwards, 1960	Elkhouly and Wiedemann, 1980; John et al., 1982
Escherichia coli	Human lower gut	Blattner et al., 1997
Franconibacter pulveris	Fruit powder, infant formula and an infant formula production environment	Stephan et al., 2014
Klebsiella oxytoca	Sour milk	Flügge, 1886	García-Fernández et al., 2016
Klebsiella pneumoniae	Human clinical specimens (respiratory tract secretions, wounds, urine, blood)	Podschun and Ullmann, 1998	Lau et al., 2008
Kluyvera ascorbata	Human clinical specimens (sputum, urine, stools, throat and blood) and water, sewage, milk and cow	Farmer et al., 1981
Kosakonia cowanii	Human clinical specimens (urine, sputum, blood and pus) and foods	Brady et al., 2013
Kosakonia sacchari	Surface-sterilized stem of sugarcane	Zhu et al., 2013
[Enterobacter] lignolyticus	Forest soil	Deangelis et al., 2011
Pluralibacter gergoviae	Human clinical specimens (urine, pus, blood, sputum, wound, abscess, vagina, lung, ear drainage, cyst, kidney and hand) and cosmetic, water, environment	Brady et al., 2013
Pseudescherichia vulneris	Human wounds, sputum, blood, vagina, urine, stools and lymph nodes	Brenner et al., 1982
Shimwellia blattae	Hindgut of the cockroach	Burgess et al., 1973
Siccibacter turicensis	Fruit powder	Stephan et al., 2007
Trabulsiella odontotermitis	Gut of the termite	Chou et al., 2007
unclassified Enterobacteriaceae (miscellaneous)	NA	NA	NA
Yokenella regensburgei	Human clinical specimens (urine, wound, abscess) and insect intestine	Kosako et al., 1984	Jain et al., 2013
Spirochaetaceae
Alkalispirochaeta alkalica	The gut of a wood-eating cockroach	Sravanthi et al., 2016
Sediminispirochaeta smaragdinae	Oil field	Magot et al., 1997
Spirochaeta africana	Soda lakes in the East African Rift	Zhilina et al., 1996
Spirochaeta lutea	Marine habitats	Shivani et al., 2015
Spirochaeta thermophila	Marine hot spring	Aksenova et al., 1992	Wang et al., 2019
Treponema brennaborense	A dairy cow suffering from digital dermatitis	Schrank et al., 1999	Obregon-Tito et al., 2015 (related strains)
Treponema maltophilum	Human periodontal lesions	Wyss et al., 1996	Angelakis et al., 2018
Treponema medium	Human subgingival dental plaque	Umemoto et al., 1997	Angelakis et al., 2018
Treponema pallidum	Cerebrospinal fluid of a neurosyphilis patient	Nichols and Hough, 1913	Tsinganou and Gebbers, 2010 (human intestinal spirochetosis)
Treponema phagedenis	Digital dermatitis lesion in cattle	Trott et al., 2003
Treponema primitia	Termite gut	Graber et al., 2004	Ishaq and Wright, 2012 - moose
Treponema socranskii	Human periodontia	Smibert et al., 1984	Angelakis et al., 2018
Treponema vincentii	Human oral cavity	Choi et al., 1996	Evans et al., 2011 – dairy cattle
